# Supplementary material for: Statistical experimental design, least squares-support vector machine (LS-SVM) and artificial neural network (ANN) methods for modeling the facilitated adsorption of methylene blue dye
Source: Royal Society of Chemistry journal article supplement (doi:10.1039/c6ra01874b), 2016-01-01
Supplement: c6ra01874b1.pdf [file c6ra01874b1.pdf]

Table A. *Dependence between MSE, R<sup>2</sup> and number of neurons at hidden layer*

| Number of neuron | Train set        |                 | Test set        |                 |
|------------------|------------------|-----------------|-----------------|-----------------|
|                  | MSR              | R <sup>2</sup>  | MSR             | R <sup>2</sup>  |
| 2                | 0.004734         | 0.901742        | 0.008372        | 0.219136        |
| 3                | 0.000764         | 0.98414         | 0.001512        | 0.858966        |
| 4                | 0.0000399        | 0.999171        | 0.001433        | 0.866319        |
| 5                | 0.00019          | 0.996066        | 0.000613        | 0.942836        |
| 6                | 0.0000328        | 0.998319        | 0.000271        | 0.974695        |
| 7                | 0.0000331        | 0.998474        | 0.000276        | 0.974288        |
| <b>8</b>         | <b>0.0000318</b> | <b>0.998534</b> | <b>0.000264</b> | <b>0.998419</b> |
| 9                | 0.0000331        | 0.998314        | 0.000278        | 0.97406         |
| 10               | 0.0000349        | 0.996276        | 0.000326        | 0.969554        |
| 11               | 0.0000345        | 0.922407        | 0.000333        | 0.968901        |
| 12               | 0.0000337        | 0.90865         | 0.000347        | 0.967623        |
| 13               | 0.0000347        | 0.896056        | 0.000348        | 0.967522        |
| 14               | 0.0000318        | 0.857448        | 0.000349        | 0.967482        |
| 15               | 0.0000337        | 0.718585        | 0.0005          | 0.953346        |

\* **Bold** show the best model
